# Supplementary material
Source: publisher site journal article supplement (https://www.spandidos-publications.com/3127/downloadSupplementary)
Supplement: Supplementary file 2 [file downloadSupplementary]

## Sheet: Sheet1
Table SVIII. Gene Ontology analysis of the potential targets of differentially expressed long non-coding RNAs regulated in a trans regulatory manner.
Category	Term	Count	%	P-value	Genes	List Total	Pop Hits	Pop Total	Fold Enrichment	Bonferroni	Benjamini	False discovery rate
GOTERM_BP_DIRECT	GO:0006919~activation of cysteine-type endopeptidase activity involved in apoptotic process	8	1.16448	0.00662723	BID, RNF7, ACER2, MUL1, FAM162A, APAF1, PMAIP1, F2R	557	70	17535	3.59785	1	1	10.912
GOTERM_BP_DIRECT	GO:0035356~cellular triglyceride homeostasis	3	0.436681	0.0189591	FITM2, SIRT1, NR1H4	557	7	17535	13.4919	1	1	28.2957
GOTERM_BP_DIRECT	GO:0045730~respiratory burst	3	0.436681	0.0247534	SLC11A1, CYBB, NCF1	557	8	17535	11.8054	1	1	35.3097
GOTERM_BP_DIRECT	GO:2000210~positive regulation of anoikis	3	0.436681	0.0247534	CHEK2, SIK1, PTRH2	557	8	17535	11.8054	1	1	35.3097
GOTERM_BP_DIRECT	GO:0046085~adenosine metabolic process	3	0.436681	0.0381525	NT5C3A, NT5E, ACPP	557	10	17535	9.44434	1	1	49.1333
GOTERM_BP_DIRECT	GO:0010501~RNA secondary structure unwinding	5	0.727802	0.0433269	DDX27, DDX17, DDX55, DDX28, DDX39B	557	42	17535	3.74776	1	1	53.6847
GOTERM_BP_DIRECT	GO:0005975~carbohydrate metabolic process	9	1.31004	0.0455605	PGLS, LCTL, ADPGK, MLEC, PKLR, CHST3, CHST4, B4GALT6, NEU3	557	125	17535	2.26664	1	1	55.5283
GOTERM_BP_DIRECT	GO:0051260~protein homooligomerization	12	1.74672	0.0468498	P2RX5, BID, PEX11B, PEO1, ATL2, AK3, TOR1B, KCTD18, APAF1, ADIPOQ, KCNG4, KCTD14	557	195	17535	1.9373	1	1	56.5608
GOTERM_BP_DIRECT	GO:0090305~nucleic acid phosphodiester bond hydrolysis	6	0.873362	0.0520576	HARBI1, REXO4, MRE11A, SETMAR, EXOG, EXD1	557	64	17535	2.95136	1	1	60.5057
GOTERM_BP_DIRECT	GO:0032543~mitochondrial translation	4	0.582242	0.0527923	MRPL10, MRPS15, HARS2, GATC	557	27	17535	4.66387	1	0.999998	61.0342
GOTERM_BP_DIRECT	GO:0007286~spermatid development	8	1.16448	0.053795	DHH, NME5, TTC26, PIWIL1, AFF4, BRIP1, ODF2, ZMYND15	557	107	17535	2.35373	1	0.999995	61.7448
GOTERM_BP_DIRECT	GO:0043123~positive regulation of I-kappaB kinase/NF-kappaB signaling	10	1.4556	0.0550093	IRAK4, NUP62, TNFRSF19, MUL1, TMEM101, MALT1, HTR2B, ADIPOQ, BIRC2, F2R	557	153	17535	2.05759	1	0.999987	62.589
GOTERM_BP_DIRECT	GO:0006164~purine nucleotide biosynthetic process	3	0.436681	0.0621364	OASL2, NT5E, PFAS	557	13	17535	7.26488	1	0.999992	67.2007
GOTERM_BP_DIRECT	GO:0046621~negative regulation of organ growth	3	0.436681	0.0621364	ANKRD26, WWC1, STK4	557	13	17535	7.26488	1	0.999992	67.2007
GOTERM_BP_DIRECT	GO:0045684~positive regulation of epidermis development	2	0.291121	0.0624124	PPARD, TMEM79	557	2	17535	31.4811	1	0.999981	67.368
GOTERM_BP_DIRECT	GO:0055114~oxidation-reduction process	29	4.22125	0.0640172	PYCRL, ME2, GMPR2, HSD17B1, HSD3B7, PYROXD1, AKR1C12, LOC100362350, ADH6, AKR1C13, MIOX, VKORC1, PNPO, NOS3, AKR1C12L1, QSOX2, DUS1L, PTGR2, NCF1, FOXRED2, CYP2C6V1, CYBB, DHFR, CYP4F17, BLVRB, CYBRD1, AOX4, ALDH9A1, AOC3	557	651	17535	1.40239	1	0.999968	68.3251
GOTERM_BP_DIRECT	GO:0006952~defense response	5	0.727802	0.0651001	CCR5, FCGR2B, IRGM, TAP1, CXCL6	557	48	17535	3.27929	1	0.999947	68.9559
GOTERM_BP_DIRECT	GO:0007584~response to nutrient	9	1.31004	0.0703029	CYBB, TNFRSF11B, BCHE, PKLR, ADSL, APAF1, ADIPOQ, CCL28, AGL	557	137	17535	2.0681	1	0.999954	71.8251
GOTERM_BP_DIRECT	GO:0034198~cellular response to amino acid starvation	4	0.582242	0.0740263	RPL17, ATF3, WDR59, DEPDC5	557	31	17535	4.06208	1	0.999951	73.7229
GOTERM_BP_DIRECT	GO:0090200~positive regulation of release of cytochrome c from mitochondria	4	0.582242	0.0740263	BID, CIDEB, FAM162A, PMAIP1	557	31	17535	4.06208	1	0.999951	73.7229
GOTERM_BP_DIRECT	GO:0007254~JNK cascade	4	0.582242	0.0798433	IRAK4, CASR, HACD3, MAP3K13	557	32	17535	3.93514	1	0.99996	76.4485
GOTERM_BP_DIRECT	GO:0055072~iron ion homeostasis	4	0.582242	0.0798433	SLC11A1, EIF2AK1, HFE2, EPB42	557	32	17535	3.93514	1	0.99996	76.4485
GOTERM_BP_DIRECT	GO:0042771~intrinsic apoptotic signaling pathway in response to DNA damage by p53 class mediator	4	0.582242	0.0858521	TOPORS, PMAIP1, CHEK2, SIRT1	557	33	17535	3.8159	1	0.999968	78.9828
GOTERM_BP_DIRECT	GO:0008630~intrinsic apoptotic signaling pathway in response to DNA damage	5	0.727802	0.0868402	NFATC4, TOPORS, PMAIP1, CHEK2, SIRT1	557	53	17535	2.96992	1	0.999953	79.3741
GOTERM_BP_DIRECT	GO:0006450~regulation of translational fidelity	3	0.436681	0.0898682	VARS2, AARSD1, GATC	557	16	17535	5.90272	1	0.999946	80.5309
GOTERM_BP_DIRECT	GO:1904179~positive regulation of adipose tissue development	2	0.291121	0.0921448	SIRT1, NR1H4	557	3	17535	20.9874	1	0.999934	81.36
GOTERM_BP_DIRECT	GO:0035330~regulation of hippo signaling	2	0.291121	0.0921448	NEK8, WWC1	557	3	17535	20.9874	1	0.999934	81.36
GOTERM_BP_DIRECT	GO:0006419~alanyl-tRNA aminoacylation	2	0.291121	0.0921448	AARSD1, AARS2	557	3	17535	20.9874	1	0.999934	81.36
GOTERM_BP_DIRECT	GO:0006720~isoprenoid metabolic process	2	0.291121	0.0921448	GGPS1, PHYH	557	3	17535	20.9874	1	0.999934	81.36
GOTERM_BP_DIRECT	GO:0006772~thiamine metabolic process	2	0.291121	0.0921448	TPK1, ACPP	557	3	17535	20.9874	1	0.999934	81.36
GOTERM_BP_DIRECT	GO:0033615~mitochondrial proton-transporting ATP synthase complex assembly	2	0.291121	0.0921448	TMEM70, ATPAF1	557	3	17535	20.9874	1	0.999934	81.36
GOTERM_BP_DIRECT	GO:0006833~water transport	3	0.436681	0.0997869	MIP, MYLK2, SLC14A1	557	17	17535	5.5555	1	0.999955	83.9066
GOTERM_CC_DIRECT	GO:0005739~mitochondrion	79	11.4993	6.25303e-05	MRPS35, SPG7, IBA57, VARS2, NIF3L1, NT5C3A, EHHADH, FASTK, ACOT2, GCAT, GNL3L, PMAIP1, NDUFAF1, DDX28, TPP1, STARD6, FITM2, ABHD11, EXOG, NOS3, PRSS35, MRPL52, MRPL51, NUDT2, ACO2, NOL7, TMEM70, SYNJ2BP, CD3EAP, NVL, COQ2, TMEM186, PPM1K, ADSL, ATPAF1, AARS2, ALDH9A1, FMC1, GATC, NEU4, BID, RGD1311756, ME2, MRPS15, HACD3, ADH6, SFXN2, PTRH2, RPP14, MRPL10, TAP1, HARS2, ABCD2, FAM162A, SLC25A44, P…	582	1602	18520	1.56922	0.0259216	0.0259216	0.0878008
GOTERM_CC_DIRECT	GO:0030176~integral component of endoplasmic reticulum membrane	9	1.31004	0.00637338	ACER3, ZFYVE27, HACD3, TMEM33, FITM2, SLC37A3, EMC6, TAP1, UBXN8	582	88	18520	3.25445	0.931805	0.738859	8.58986
GOTERM_CC_DIRECT	GO:0045335~phagocytic vesicle	6	0.873362	0.00881082	LAMP1, CYBB, RAB8B, RAB39A, RAB23, RAB14	582	41	18520	4.65678	0.975692	0.710321	11.6898
GOTERM_CC_DIRECT	GO:0005777~peroxisome	10	1.4556	0.0147204	HACL1, PEX11B, EHHADH, LOC103689943, ABCD2, PEX6, MUL1, ABCD4, PHYH, ATAD1	582	122	18520	2.6083	0.998028	0.789259	18.8049
GOTERM_CC_DIRECT	GO:0005622~intracellular	45	6.55022	0.0190603	MOB1A, ZFP69, GNA12, WASF2, RGL3, SEC14L4, ZFP566, STK32A, RASGRP3, GMIP, CLCF1, MOB3A, ZFP354A, RHOD, SHC2, ARL5B, RLBP1, TBC1D9B, DDC, ZFP382, TBC1D10B, PIK3C2B, NFAM1, ZFP39, ACPP, RGS14, FSD1, VEGFB, ZFP9, TTPAL, NME5, CYBB, DOK2, GRM2, TOM1L1, POGK, HEATR3, MAPK13, TRIM31, POLDIP3, LOC102555377, MILR1, RAB14, DENND3, MAP3K13	582	1016	18520	1.40941	0.999691	0.801411	23.6869
GOTERM_CC_DIRECT	GO:0005730~nucleolus	36	5.24017	0.031934	STOX1, YPEL4, LOC365238, CDC14B, GNL3L, LIN28A, SMUG1, RPP14, DDX27, DDX28, REXO4, TRIM69, RPL9, ZFP354A, NOS3, FAM32A, NANOG, ABCB8, EMG1, NOL7, NUSAP1, MALT1, CCDC137, SIRT1, RBBP9, CD3EAP, NVL, OASL, RASL11A, ATF3, TIMELESS, MAP1S, PRKRIP1, CDCA7L, SLC14A1, C1D	582	804	18520	1.42483	0.999999	0.896879	36.6121
GOTERM_CC_DIRECT	GO:0030670~phagocytic vesicle membrane	4	0.582242	0.0341244	SLC11A1, RAB8B, IRGM, RAB11FIP1	582	23	18520	5.53414	1	0.875471	38.5974
GOTERM_CC_DIRECT	GO:0005876~spindle microtubule	5	0.727802	0.0388753	NUMA1, SKA3, NUSAP1, AURKB, BIRC2	582	41	18520	3.88065	1	0.87528	42.7065
GOTERM_CC_DIRECT	GO:0072546~ER membrane protein complex	3	0.436681	0.0447975	MMGT1, EMC6, EMC1	582	11	18520	8.67854	1	0.882207	47.471
GOTERM_CC_DIRECT	GO:0016605~PML body	7	1.01892	0.0484141	ATRX, MRE11A, SMC5, TOPORS, CHEK2, SIRT1, RGS14	582	84	18520	2.65178	1	0.875601	50.1967
GOTERM_CC_DIRECT	GO:0000346~transcription export complex	3	0.436681	0.0609759	POLDIP3, DDX39B, THOC7	582	13	18520	7.34338	1	0.909479	58.6773
GOTERM_CC_DIRECT	GO:0035861~site of double-strand break	4	0.582242	0.077886	MRE11A, SETMAR, SMC5, PARP3	582	32	18520	3.97766	1	0.941459	67.987
GOTERM_CC_DIRECT	GO:0000922~spindle pole	7	1.01892	0.0782158	CDC6, NUMA1, POC1B, NUP62, ODF2, TOPORS, RGS14	582	95	18520	2.34473	1	0.928013	68.1474
GOTERM_CC_DIRECT	GO:0030659~cytoplasmic vesicle membrane	6	0.873362	0.0790291	N4BP3, SMAGP, RAB14, SPIRE1, APPBP2, AGTRAP	582	73	18520	2.61545	1	0.915399	68.5399
GOTERM_CC_DIRECT	GO:0005778~peroxisomal membrane	5	0.727802	0.0798015	PEX11B, RAB8B, ABCD2, PEX6, ATAD1	582	52	18520	3.05974	1	0.902572	68.9085
GOTERM_MF_DIRECT	GO:0005524~ATP binding	69	10.0437	0.000291413	SPG7, VARS2, PEX6, SLFN5, MLH3, AURKB, DDX27, TPK1, DDX17, DDX28, OASL2, EEF2K, MLKL, SIK1, EIF2B2, DDX39B, MYLK2, HLTF, UBE2C, STK4, NVL, RFC5, EIF2AK1, CDKL1, UBE2K, PKLR, NEK8, NEK4, KSR1, MAP3K13, MYO18A, AARS2, GATC, BTAF1, POMK, CAMK2G, BLK, CHEK2, RIOK1, PFAS, IRAK4, STK32A, SPEG, MCMDC2, TAP1, HARS2, ABCD2, TOR1B, LMTK2, ABCD4, CHD5, DHX8, ABCB8, AK3, BRIP1, AARSD1, IDNK, ATAD1, P2RX5, AT…	530	1403	16650	1.545	0.184315	0.184315	0.438485
GOTERM_MF_DIRECT	GO:0046872~metal ion binding	61	8.87918	0.00755261	GNA15, GMPR2, GNA12, AURKB, ZFP786, TPP1, MIS18A, OASL2, EXOG, MT1, ZFP354A, NT5E, SPON1, ZFP35, ZFP329, RXFP1, ZFP39, ZBTB24, ZFP865, ZFYVE27, PPM1K, ZFP791, LOC102555377, CYBRD1, NEK8, ME2, MOB1A, YPEL4, GALNT7, ZBTB9, ZFP69, USP4, ZFP717, ZFP566, ZFP668, GMIP, RASGRP3, OVOL1, GALNS, ZFP410, GGPS1, TGM4, B4GALT6, PTS, RASA2, RHEBL1, IKZF5, STAMBP, ZFP382, KLF8, AARSD1, PHYH, ZFP444, SIRT1, ZFP9…	530	1377	16650	1.39166	0.995005	0.929325	10.8017
GOTERM_MF_DIRECT	GO:0016773~phosphotransferase activity, alcohol group as acceptor	3	0.436681	0.0138827	POMK, ADPGK, FAM20B	530	6	16650	15.7075	0.999943	0.961509	19.0053
GOTERM_MF_DIRECT	GO:0003676~nucleic acid binding	32	4.65793	0.014525	ZFP69, ZBTB9, ZFP717, ZFP786, GIN1, DDX17, ZFP668, ZFP566, GPKOW, OVOL1, ZFP410, EXOG, ZFP354A, RDM1, ZCCHC4, ZFP35, ZFP382, ZMYM1, KLF8, ZFP329, DDX39B, LOC103689943, EXD1, HLTF, ZFP444, ZFP9, ZFP865, POLDIP3, ZFP791, LOC102555377, THOC7, AARS2	530	645	16650	1.55858	0.999964	0.922452	19.7971
GOTERM_MF_DIRECT	GO:0005525~GTP binding	21	3.05677	0.0195288	GNA15, NUDT2, RSG1, RAB8B, ATL2, RAB39A, IRGM, GNA12, GIMAP9, AK3, GNL3L, DRG1, URGCP, P2RX5, RASL11A, RAB14, RAB23, RHOD, EIF2B2, ARL5B, RHEBL1	530	380	16650	1.7361	0.999999	0.936527	25.7226
GOTERM_MF_DIRECT	GO:0042605~peptide antigen binding	5	0.727802	0.0290718	TAP1, RT1-S3, RT1-T24-1, RT1-T24-4, RT1-T24-3	530	37	16650	4.24528	1	0.967841	35.9069
GOTERM_MF_DIRECT	GO:0004004~ATP-dependent RNA helicase activity	6	0.873362	0.0441135	DHX8, DDX27, DDX17, DDX55, DDX28, DDX39B	530	61	16650	3.09001	1	0.988948	49.3509
GOTERM_MF_DIRECT	GO:0008253~5'-nucleotidase activity	3	0.436681	0.0538676	NT5C3A, NT5E, ACPP	530	12	16650	7.85377	1	0.992079	56.608
GOTERM_MF_DIRECT	GO:0016853~isomerase activity	3	0.436681	0.0623546	FUOM, HSD3B7, TOPORS	530	13	16650	7.24964	1	0.993265	62.1203
GOTERM_MF_DIRECT	GO:0044547~DNA topoisomerase binding	2	0.291121	0.0625359	SETMAR, TOPORS	530	2	16650	31.4151	1	0.989045	62.2307
GOTERM_MF_DIRECT	GO:0030145~manganese ion binding	5	0.727802	0.0654698	PPEF2, MRE11A, PPM1M, NEK4, XPNPEP3	530	48	16650	3.27241	1	0.986469	63.9741
GOTERM_MF_DIRECT	GO:0005102~receptor binding	18	2.62009	0.0695465	HACL1, RAB8B, HFE2, EHHADH, BLK, ACOT2, RT1-S3, ADIPOQ, NCR3, LAMA1, WNT4, CLCF1, MSN, RT1-T24-1, RT1-T24-4, F2R, RT1-T24-3, SLC39A1	530	361	16650	1.5664	1	0.984987	66.2723
GOTERM_MF_DIRECT	GO:0004185~serine-type carboxypeptidase activity	3	0.436681	0.0712575	CPM, CPVL, CPN1	530	14	16650	6.73181	1	0.981217	67.1954
GOTERM_MF_DIRECT	GO:0097602~cullin family protein binding	3	0.436681	0.0805415	DCUN1D1, RNF7, ANAPC11	530	15	16650	6.28302	1	0.984892	71.8066
GOTERM_MF_DIRECT	GO:0015279~store-operated calcium channel activity	3	0.436681	0.0805415	ORAI2, TRPC1, ORAI3	530	15	16650	6.28302	1	0.984892	71.8066
GOTERM_MF_DIRECT	GO:0015198~oligopeptide transporter activity	2	0.291121	0.0923244	SLCO1B2, SLC15A1	530	3	16650	20.9434	1	0.989046	76.7892
GOTERM_MF_DIRECT	GO:0004813~alanine-tRNA ligase activity	2	0.291121	0.0923244	AARSD1, AARS2	530	3	16650	20.9434	1	0.989046	76.7892
GOTERM_MF_DIRECT	GO:0051879~Hsp90 protein binding	4	0.582242	0.092461	NUP62, PPEF2, NOS3, CDC37	530	34	16650	3.69589	1	0.985571	76.8418
KEGG_PATHWAY	rno00600:Sphingolipid metabolism	7	1.01892	0.00491816	ACER3, SGPP2, ACER2, B4GALT6, NEU3, ASAH1, NEU4	254	49	7749	4.35827	0.689161	0.689161	6.15361
KEGG_PATHWAY	rno05152:Tuberculosis	13	1.89229	0.0158743	IRAK4, BID, LAMP1, FCGR2B, MAPK13, CAMK2G, ITGB2, MALT1, APAF1, KSR1, RT1-DOA, IFNGR2, CD14	254	182	7749	2.17913	0.977458	0.849861	18.6272
KEGG_PATHWAY	rno01130:Biosynthesis of antibiotics	14	2.03785	0.0269494	PYCRL, ACO2, ADPGK, EHHADH, AK3, IDNK, PFAS, NME5, GALM, PGLS, PKLR, GGPS1, ADSL, ALDH9A1	254	219	7749	1.95028	0.998458	0.884469	29.6663
KEGG_PATHWAY	rno05416:Viral myocarditis	8	1.16448	0.0273184	BID, CD80, ITGB2, RT1-S3, RT1-DOA, RT1-T24-1, RT1-T24-4, RT1-T24-3	254	90	7749	2.71181	0.998591	0.806241	30.0092
KEGG_PATHWAY	rno04020:Calcium signaling pathway	12	1.74672	0.0395867	P2RX5, ORAI2, GNA15, ATP2A2, CAMK2G, RYR1, MYLK2, NOS3, HTR2B, HTR5B, F2R, ORAI3	254	185	7749	1.97889	0.99993	0.852593	40.5666
KEGG_PATHWAY	rno04146:Peroxisome	7	1.01892	0.0587755	HACL1, PEX11B, EHHADH, ABCD2, PEX6, ABCD4, PHYH	254	85	7749	2.51241	0.999999	0.908614	54.1729
KEGG_PATHWAY	rno00380:Tryptophan metabolism	5	0.727802	0.062174	DDC, EHHADH, AOX4, ALDH9A1, AFMID	254	46	7749	3.31607	1	0.886201	56.2593
KEGG_PATHWAY	rno05332:Graft-versus-host disease	6	0.873362	0.0636902	CD80, RT1-S3, RT1-DOA, RT1-T24-1, RT1-T24-4, RT1-T24-3	254	66	7749	2.77344	1	0.857667	57.1616
KEGG_PATHWAY	rno05330:Allograft rejection	6	0.873362	0.0778506	CD80, RT1-S3, RT1-DOA, RT1-T24-1, RT1-T24-4, RT1-T24-3	254	70	7749	2.61496	1	0.881669	64.7971
KEGG_PATHWAY	rno05145:Toxoplasmosis	8	1.16448	0.081778	IRAK4, LAMA1, CCR5, MAPK13, IRGM, RT1-DOA, IFNGR2, BIRC2	254	115	7749	2.12229	1	0.867608	66.6803
KEGG_PATHWAY	rno05140:Leishmaniasis	6	0.873362	0.0855163	IRAK4, MAPK13, NCF1, ITGB2, RT1-DOA, IFNGR2	254	72	7749	2.54232	1	0.85428	68.3861
KEGG_PATHWAY	rno05166:HTLV-I infection	15	2.18341	0.09116	CRTC3, ANAPC1, ITGB2, CHEK2, ANAPC11, RT1-S3, RT1-DOA, FZD6, WNT4, ATF3, ELK4, NFATC4, RT1-T24-1, RT1-T24-4, RT1-T24-3	254	289	7749	1.58345	1	0.8486	70.8093
KEGG_PATHWAY	rno04612:Antigen processing and presentation	7	1.01892	0.0969564	PSME2, TAP1, RT1-S3, RT1-DOA, RT1-T24-1, RT1-T24-4, RT1-T24-3	254	97	7749	2.2016	1	0.844211	73.1187
KEGG_PATHWAY	rno01100:Metabolic pathways	51	7.42358	0.0991965	ETNPPL, NT5C3A, EHHADH, ACOT2, ASAH1, AFMID, TPK1, PRIM1, PIGH, NOS3, NT5E, DDC, ACO2, PIK3C2B, PNPLA3, NME5, COQ2, PGLS, PKLR, ADSL, ALDH9A1, GATC, AOC3, PYCRL, GALNT7, HSD17B1, ADPGK, HSD3B7, LOC100362350, ADH6, PFAS, GALM, STT3A, CSAD, GALNS, GGPS1, PNPO, PCYT1B, B4GALT6, PTS, LIPT1, AGL, POLR3F, ACER2, IDNK, MMAB, CYP2C6V1, DHFR, DNMT1, AOX4, PHYKPL	254	1285	7749	1.21082	1	0.829411	73.9652
